# Supplementary material for: Engineering Noble Metal-like Bi onto Hierarchical SrWO4 for the Enhancement of Photocatalytic Activity
Source: MDPI journal article supplement (doi:10.3390/catal12070787), 2022-07-18
Supplement: s1 [file s1]

*Supplementary Information*

# **Engineering Noble Metal-Like Bi onto Hierarchical SrWO<sub>4</sub> for the Enhancement of Photocatalytic Activity**

**Liang Tang, Jian Zhao, Xiao Wang, Jiajun Wang and Peng Zhang \***

Key Laboratory of Organic Compound Pollution Control Engineering (MOE), School of Environmental and chemical engineering, Shanghai University, Shanghai 200444, China; tang1liang@shu.edu.cn (L.T.); zhaojian1997@shu.edu.cn (J.Z.); wangxiaowx@shu.edu.cn (X.W.); wangjiajun123@shu.edu.cn (J.W.)

\* Correspondence: pengzhang@shu.edu.cn

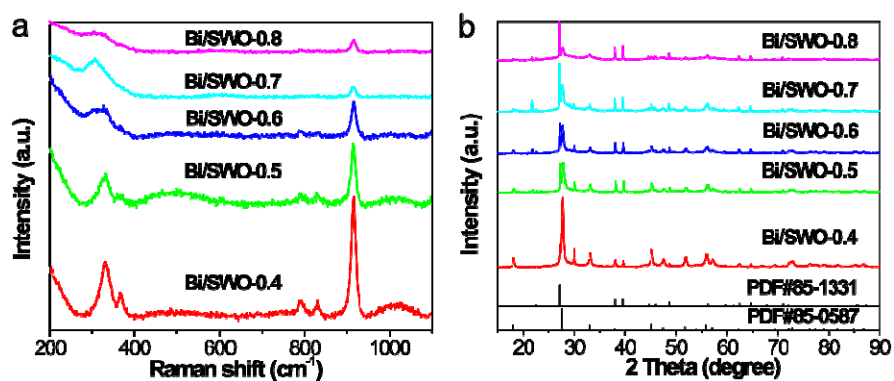

Figure S1. Raman spectra (a) and XRD patterns (b) of SWO with different mass ratio of Bi.

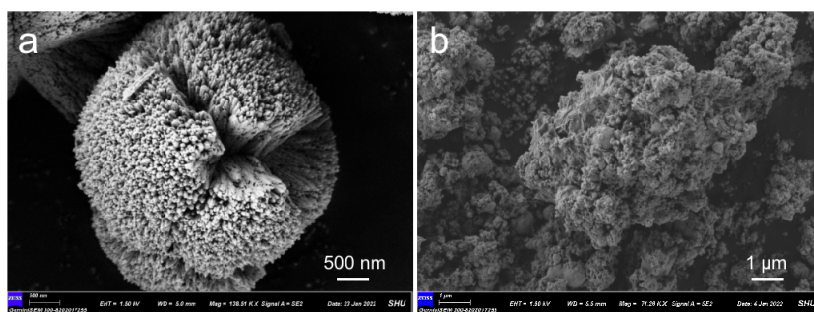

Figure S2. SEM images of SWO after hydrothermal treatment (a) and direct synthesis of Bi (b).

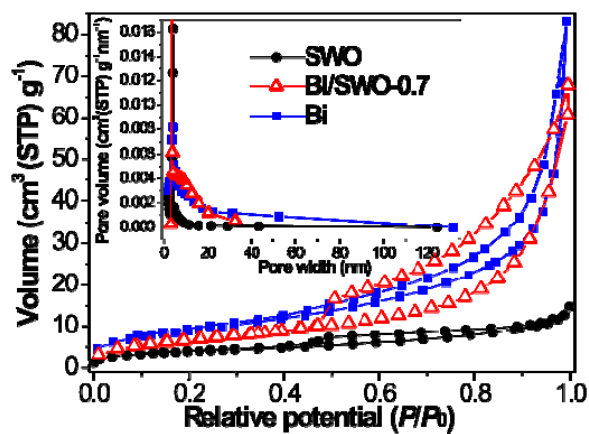

Figure S3. N<sub>2</sub> adsorption-desorption isotherms curves and pore diameter distribution curves (inset) of Bi, SWO and Bi/SWO-0.7, respectively.

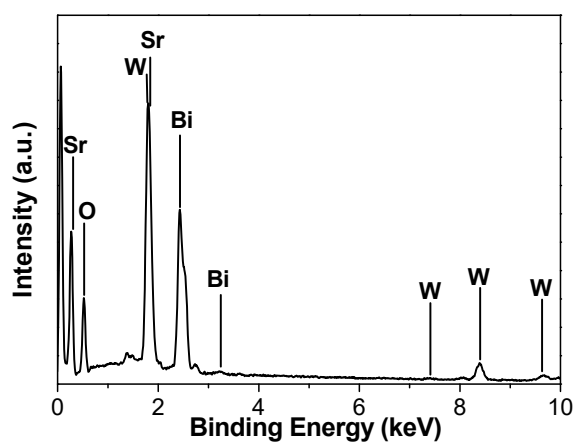

**Figure S4.** EDX spectrum of the resultant Bi/SWO-0.7.

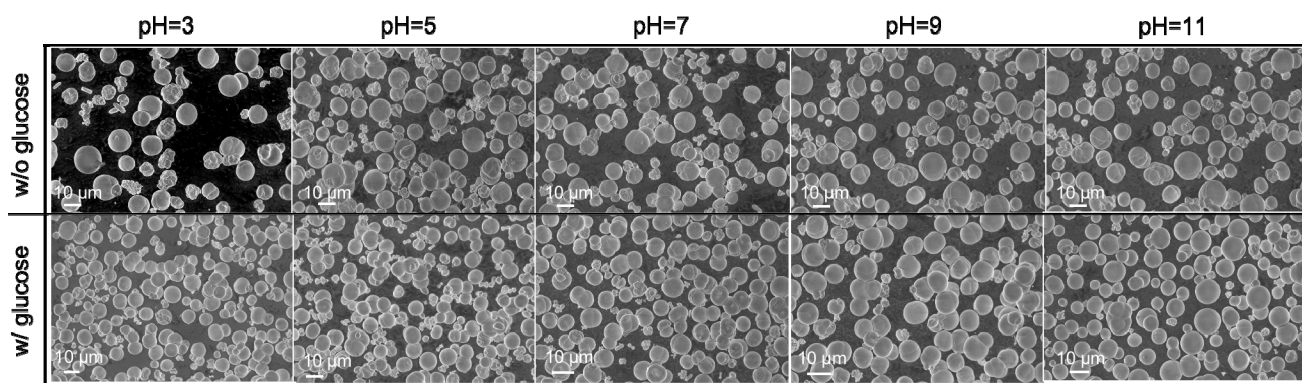

**Figure S5.** SEM images of pH independent morphology on the control products along with glucose addition.

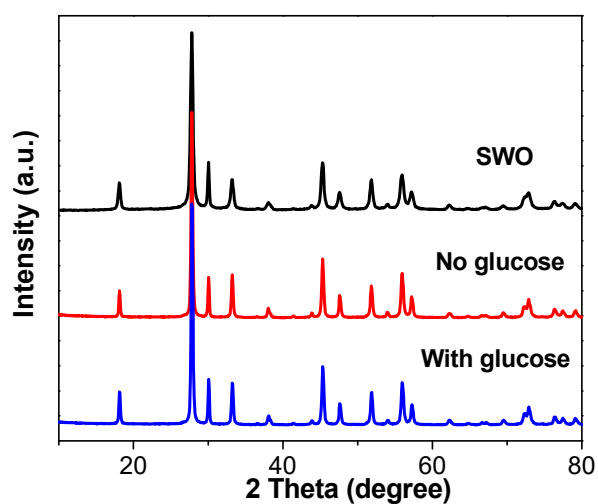

**Figure S6.** XRD patterns of SWO samples obtained with and without glucose addition from hydrothermal aging at pH=6.9.

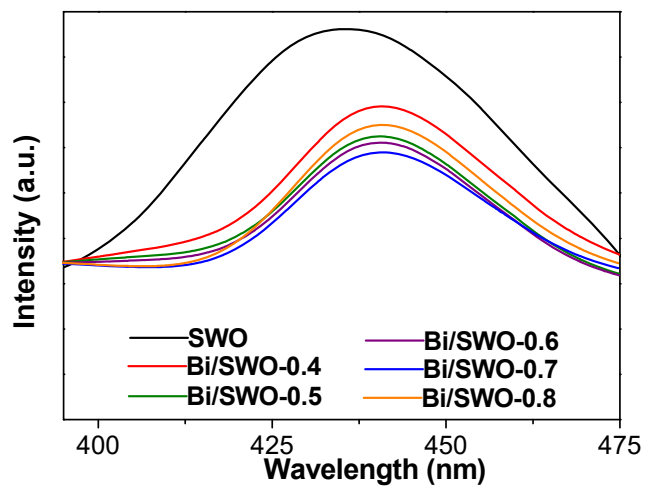

**Figure S7.** PL spectra for SWO and their composites with different amounts of Bi.

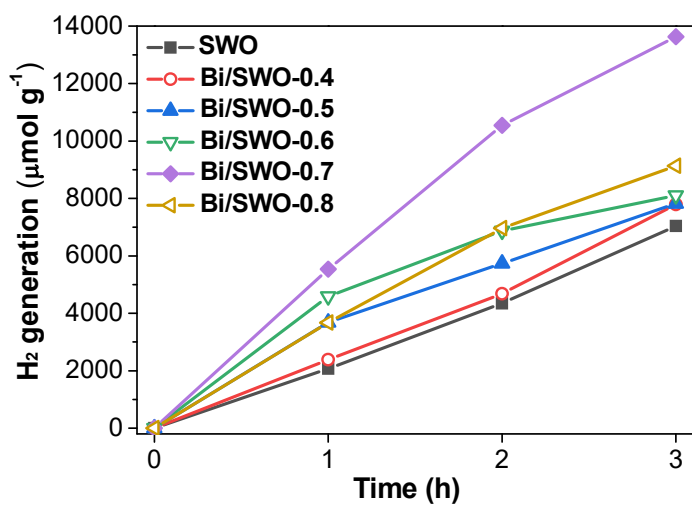

**Figure S8.** Comparable H<sub>2</sub> generation between SWO and their composites with different amounts of Bi.

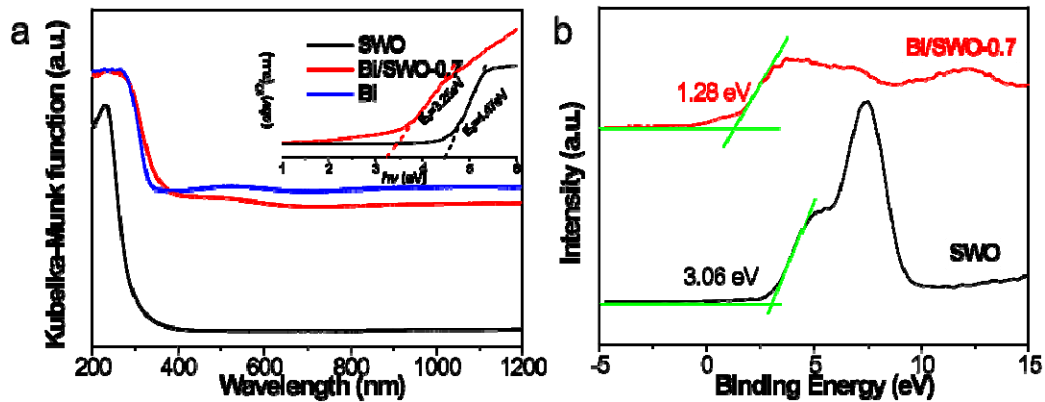

**Figure S9.** Steady-state diffuse reflectance UV-visible spectrum (a) with corresponding Tauc plots (inset) and valence-band XPS (b) for the samples.

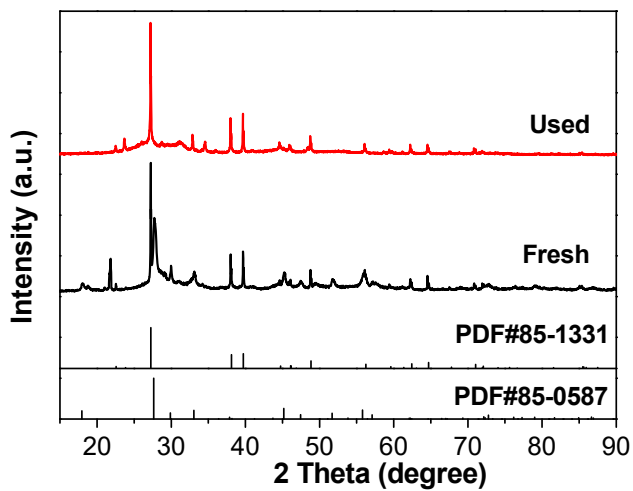

**Figure S10.** The comparable XRD patterns of Bi/SWO-0.7 before and after long-term experiment.

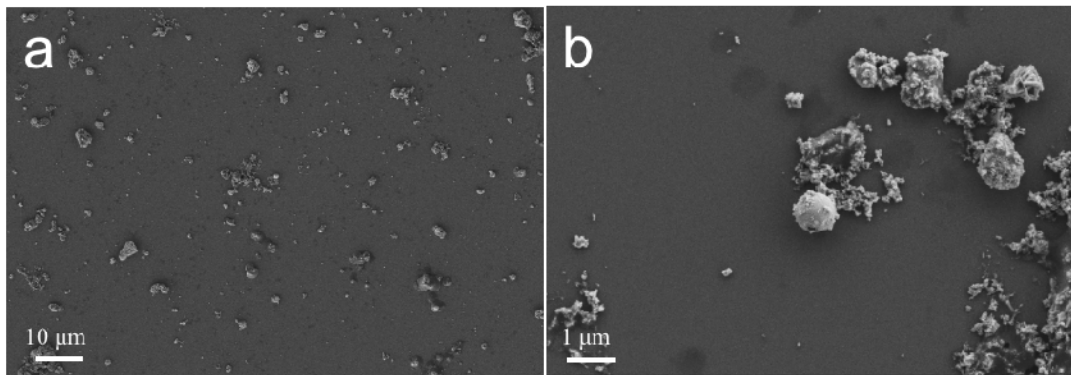

**Figure S11.** The SEM images of Bi/SWO-0.7 after long-term experiment.

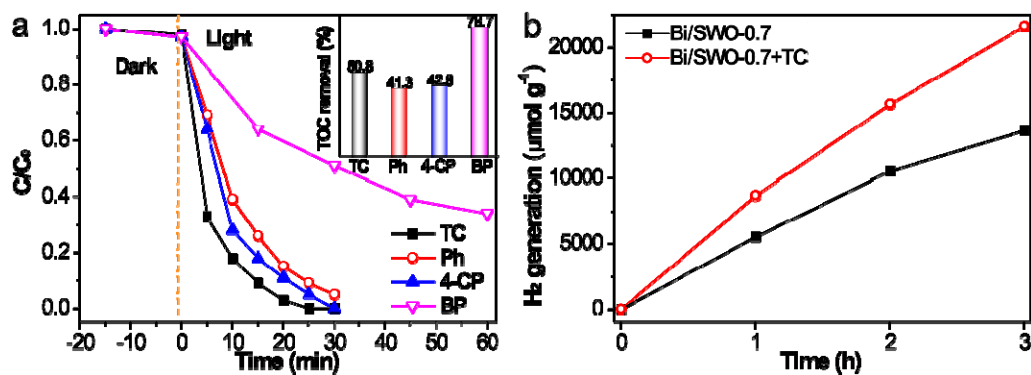

**Figure S12.** Photodegradation of typical pollutants (a) with their total organic carbon (TOC) removal (inset) and synchronous H<sub>2</sub> production and TC degradation (b).

**Table S1.** The specific surface area and the average pore size of the photocatalysts.

| Samples    | Surface area (m <sup>2</sup> g <sup>-1</sup> ) | Pore volume (cm <sup>3</sup> g <sup>-1</sup> ) | Pore size (nm) |
|------------|------------------------------------------------|------------------------------------------------|----------------|
| SWO        | 13.7226                                        | 0.0206                                         | 6.0047         |
| Bi         | 32.8107                                        | 0.1232                                         | 15.0195        |
| Bi/SWO-0.4 | 14.9995                                        | 0.0646                                         | 13.4927        |
| Bi/SWO-0.5 | 15.3183                                        | 0.0606                                         | 12.5181        |
| Bi/SWO-0.6 | 17.8408                                        | 0.0635                                         | 9.9259         |
| Bi/SWO-0.7 | 24.8646                                        | 0.0886                                         | 7.7306         |
| Bi/SWO-0.8 | 18.8506                                        | 0.0785                                         | 13.7516        |

**Table S2.** Elemental composition of Bi/SWO-0.7 from XPS and EDS.

| Element | O     | Sr    | W     | Bi    | Total  | Method |
|---------|-------|-------|-------|-------|--------|--------|
| Atomic% | 73.36 | 1.80  | 3.00  | 21.84 | 100.00 | XPS    |
| Wt%     | 18.21 | 2.45  | 8.55  | 70.79 | 100.00 |        |
| Atomic% | 60.20 | 11.68 | 14.80 | 13.32 | 100.00 | EDS    |
| Wt%     | 14.15 | 14.52 | 37.38 | 33.95 | 100.00 |        |
